# Supplementary material for: Pathophysiological significance of increased α-synuclein deposition in sympathetic nerves in Parkinson’s disease: a post-mortem observational study
Source: Transl Neurodegener. 2022 Mar 8;11:15. doi: 10.1186/s40035-022-00289-y (PMC8905831; doi:10.1186/s40035-022-00289-y)
Supplement: Supplementary file 1 — Additional file 1. Demographic and individual data of control subjects (CTRL) and patients with Parkinson’s disease (PD). Individual values for immunoreactive signal intensities and neurochemical data from scalp skin, submandibular gland, and myocardium were tabulated. Mean values ± SEM are also shown. Other abbreviations: α-Syn = α-synuclein; Coloc. Index = α-synuclein-tyrosine hydroxylase colocalization index; cTnT = cardiac troponin T; DA = dopamine; DHPG = 3,4-dihydroxyphenylglycol; DOPAC = 3,4-dihydroxyphenylacetic acid; NE = norepinephrine; PD = Parkinson’s disease; PMI = post-mortem intervals; SMA = smooth muscle actin; SMG = submandibular gland; TH = tyrosine hydroxylase. [file 40035_2022_289_MOESM1_ESM.xlsx]

## Sheet: Data
No.	CODE	Age	Sex	PMI	SCALP SKIN		α-Syn	TH	SMA	α-Syn/SMA	TH/SMA	α-Syn/TH		α-Syn	TH	SMA	α-Syn/SMA	TH/SMA	α-Syn/TH		α-Syn	TH	SMA	α-Syn/SMA	TH/SMA	α-Syn/TH	Colocalization Index	NE	DA	DHPG	DOPAC	SUBMANDIBULAR GLAND	α-Syn	TH	SMA	α-Syn/SMA	TH/SMA	α-Syn/TH	Colocalization Index	NE	DA	DHPG	DOPAC	MYOCARDIUM	α-Syn	TH	cTnT	α-Syn/cTnT	TH/cTnT
			Male=1	hours		Arrector Pili							Blood Vessel							Sweat Gland								pmol/mg	pmol/mg	pmol/mg	pmol/mg									pmol/mg	pmol/mg	pmol/mg	pmol/mg
1	CTRL1	82	1	4			2.08333	13.4233	41.825	0.0498107	0.32094	0.155202		2.47667	5.4075	25.7692	0.0961097	0.209844	0.458006		1.9275	4.88875	14.38	0.13404	0.339969	0.394273	2.32035	0.357396	0.02843	0.0152941	0.0261905		28043.7	2.29064e+06	1.13441e+07	0.0024721	0.201924	0.0122427	-0.221849	2.15864	0.107728	0.242228	0.0438888		245234	1.76789e+06	2.84769e+07	0.00861169	0.0620815
2	CTRL2	75	1	3.33			0.473333	8.62	40.1267	0.011796	0.21482	0.0549111		1.02429	3.21286	19.1257	0.0535554	0.167986	0.318808		0.5	2.52833	13.42	0.0372578	0.1884	0.197759	0.591065	0.506311	0.0170426	0.00857015	0.0130691		40738.5	2.97068e+06	6.4654e+06	0.006301	0.459474	0.0137135	0.371068	4.16438	0.132416	0.279078	0.0221944		48587.4	2.71494e+06	3.24771e+07	0.00149605	0.0835953
3	CTRL3	93	1	4.5			0.926667	14.0333	34.1967	0.0270982	0.410371	0.0660333		2.16667	7.85	20.65	0.104923	0.380145	0.276008		3.58	11.21	25.72	0.139191	0.435848	0.319358	0.925999	0.49834	0.014032	0.0335716	0.0110871		162972	4.58603e+06	6.95027e+06	0.0234484	0.659834	0.0355368	2.29425	3.37568	0.0553965	0.495793	0.0224192		46684.6	1.05016e+06	3.34574e+07	0.00139534	0.0313878
4	CTRL4	79	1	3			0.994	11.3613	36.274	0.0274025	0.313209	0.0874897		2.63385	4.55385	21.5046	0.122478	0.211761	0.578378		0.37	3.36	24.22	0.0152766	0.138728	0.110119	1.77616	0.286958	0.0108927	0.0641648	0.0231274		9611.31	4.75287e+06	6.32034e+06	0.0015207	0.751997	0.00202221	0.977724	8.03161	0.190053	0.836306	0.0706912		25873.7	5.53553e+06	3.49186e+07	0.000740972	0.158527
5	CTRL5	74	1	3.25			0.202222	7.18667	25.7011	0.00786823	0.279625	0.0281385		0.475455	3.33091	13.9918	0.0339809	0.238061	0.14274		0.651429	2.85286	21.6843	0.0300415	0.131563	0.228343	-0.0823513	0.13774	0.0109124	0.0103483	0.0137754		23645.7	3.26392e+06	3.26092e+06	0.00725123	1.00092	0.00724457	0.322219	4.97826	0.126544	0.36242	0.045491		6031.26	1.71225e+06	1.76142e+07	0.000342409	0.0972086
6	CTRL6	88	0	12			1.09	14.1971	46.1743	0.0236062	0.307469	0.076776		1.336	6.023	32.227	0.0414559	0.186893	0.221816		0.56	5.41	24.125	0.0232124	0.224249	0.103512	1.5977	0.252108	0.0102604	0.00418086	0.0126349		22049.8	4.89106e+06	8.98756e+06	0.00245337	0.544203	0.00450818	1.81071	2.92259	0.111663	0.218639	0.0379992		5097.16	2.20032e+06	1.91446e+07	0.000266245	0.114932
7	CTRL7	87	1	72			0.245	13.0537	39.16	0.00625638	0.333344	0.0187686		0.219167	9.85333	18.2183	0.01203	0.540847	0.0222429		0.75	11.9233	12.6367	0.0593511	0.943551	0.0629019	0.491362	0.238057	0.0093187	0.00469233	IP		11054.9	4.50024e+06	1.7183e+07	0.000643362	0.261902	0.00245651	2.12137	1.76839	0.0327455	0.0315818	0.00333385		11319.1	1.22853e+06	2.20384e+07	0.000513607	0.0557449
8	CTRL8	88	0	1			1.19333	12.2967	24.9633	0.0478034	0.492589	0.0970453		0.52	9.17667	11.892	0.0437269	0.771667	0.0566655		1.84444	7.77	13.3878	0.137771	0.58038	0.23738	1.3716	0.44892	0.0242669	0.0164171	0.03971		147647	1.66047e+06	6.25533e+06	0.0236033	0.265449	0.0889183	1.00432	4.89411	0.358701	0.744289	0.131713		15279.4	3.43101e+06	3.84997e+07	0.000396871	0.0891179
9	CTRL9	74	1	5			1.0475	9.0125	31.77	0.0329714	0.28368	0.116227		1.366	4.554	33.75	0.0404741	0.134933	0.299956		n/a	n/a	n/a	n/a	n/a	n/a	0.491362	0.266778	0.011539	0.00603396	0.00391238		24657.9	1.5281e+06	5.58811e+06	0.00441257	0.273456	0.0161363	-0.574031	4.49574	0.101601	0.501951	0.045113		12770	1.14731e+06	3.56984e+07	0.000357719	0.0321391
10	CTRL10	75	0	3			0.801	9.834	23.344	0.0343129	0.421265	0.0814521		0.672857	6.65571	11.3157	0.0594622	0.588183	0.101095		0.58	4.0375	8.765	0.0661723	0.460639	0.143653	0.653213	0.866272	0.13264	0.0102288	0.0307637		9718.92	6.02308e+06	1.14527e+07	0.000848611	0.525907	0.00161361	0.168792	4.88872	1.31468	0.447678	0.240108		9152.93	2.89764e+06	4.56989e+07	0.000200288	0.0634072
11	CTRL11	87	0	3.08			0.92	9.415	40.15	0.0229141	0.234496	0.0977164		0.97	5.7875	18.9075	0.0513024	0.306095	0.167603		1.28	6.29	7.84	0.163265	0.802296	0.203498	1.28668	0.510972	0.0217471	0.00863487	0.00673659		92947.2	7.87041e+06	1.24366e+07	0.00747368	0.632842	0.0118097	0.908485	8.52987	0.198127	0.347751	0.0353791		7140.85	1.12777e+06	2.14748e+07	0.000332522	0.0525158
12	CTRL12	85	0	2.63			0.353333	14.8167	40.37	0.00875237	0.367022	0.023847		0.3825	6.6	20.455	0.0186996	0.322659	0.0579545		0.19	2.29778	10.7033	0.0177515	0.214679	0.0826886	1.49276	0.60718	0.0178063	0.0051897	0.00664277		9822.82	3.77827e+06	3.4726e+06	0.00282867	1.08803	0.00259982	1.43978	8.00758	0.277827	0.142152	0.0173278		112843	2.54112e+06	2.24196e+07	0.00503322	0.113343
	Mean	82.25	7				0.86081	11.4375	35.3379	0.0250494	0.331569	0.0753006		1.18695	6.08378	20.6506	0.0565165	0.338256	0.225106		1.11212	5.68805	16.0802	0.0748483	0.405482	0.189408	1.07632	0.414753	0.0257407	0.0156106	0.0170591		48575.8	4.00965e+06	8.30974e+06	0.00693808	0.555495	0.0165669	0.885237	4.8513	0.250624	0.387489	0.0596382		45501.2	2.27954e+06	2.93266e+07	0.00164058	0.0795
	SEM	1.9193	1.9193				0.149299	0.736612	2.1405	0.00425105	0.0231135	0.01161		0.240637	0.606398	2.04504	0.00987467	0.0570856	0.0491568		0.301916	1.01105	1.98793	0.0172236	0.0824836	0.0310561	0.196138	0.0579068	0.00987799	0.0049893	0.00342573		15856.4	530739	1.18396e+06	0.00233629	0.0836017	0.00712757	0.263289	0.656426	0.100301	0.0678472	0.0189397		20218.6	373170	2.5452e+06	0.000742736	0.0108298
No.	CODE	Age	Sex	PMI	SCALP SKIN		α-Syn	TH	SMA	α-Syn/SMA	TH/SMA	α-Syn/TH		α-Syn	TH	SMA	α-Syn/SMA	TH/SMA	α-Syn/TH		α-Syn	TH	SMA	α-Syn/SMA	TH/SMA	α-Syn/TH	Colocalization Index	NE	DA	DHPG	DOPAC	SUBMANDIBULAR GLAND	α-Syn	TH	SMA	α-Syn/SMA	TH/SMA	α-Syn/TH	Colocalization Index	NE	DA	DHPG	DOPAC	MYOCARDIUM	α-Syn	TH	cTnT	α-Syn/cTnT	TH/cTnT
						Arrector Pili							Blood Vessel							Sweat Gland
1	PD1	91	1	3			5.42818	9.93364	52.73	0.102943	0.188387	0.546445		5.0525	9.2475	27.575	0.183228	0.335358	0.546364		2.84	6.956	13.312	0.213341	0.522536	0.408281	2.18106	0.499751	IP	0.00784402	0.00585145		203248	1.02954e+06	3.36347e+06	0.0604282	0.306095	0.197416	2.25503	5.79901	0.102465	0.548041	0.0369718		97850.1	513162	3.21512e+07	0.00304344	0.0159609
2	PD2	69	1	3			7.306	15.466	38.674	0.188912	0.399907	0.472391		8.864	12.136	28.324	0.31295	0.428471	0.730389		3.49	6.62	13.39	0.260642	0.494399	0.52719	2.56478	0.478819	0.0432171	0.00929173	0.015067		5.95017e+06	4.88863e+06	1.64239e+07	0.362287	0.297654	1.21714	3.08909	1.91209	0.141246	0.070528	0.0303556		528562	1.32237e+06	3.45606e+07	0.0152938	0.0382623
3	PD3	77	0	3			7.21	14.93	44.21	0.163085	0.337706	0.48292		7.175	10.335	31.48	0.227922	0.328304	0.694243		n/a	n/a	n/a	n/a	n/a	n/a	2.19061	0.210795	0	0.00470718	0.00221441		3.63363e+06	4.81082e+06	9.68451e+06	0.3752	0.496754	0.755303	3.13681	7.05231	0.064097	0.646779	0.0120404		115042	56491.7	2.69556e+07	0.00426784	0.00209573
4	PD4	80	1	3			4.38	12.915	26.535	0.165065	0.486716	0.339141		3.08333	4.22333	20.5567	0.149992	0.205448	0.730071		6.564	3.594	28.486	0.230429	0.126167	1.82638	2.04702	0.414267	0.0756085	0.00252656	0.01177		1.37685e+06	3.42595e+06	1.16781e+07	0.1179	0.293366	0.401887	3.0821	6.9665	0.948325	0.597942	0.320403		619635	1.23751e+06	2.18808e+07	0.0283187	0.0565571
5	PD5	70	1	4			3.92263	8.72143	21.7771	0.180126	0.400485	0.449769		3.27	5.51667	12.91	0.253292	0.427317	0.592749		3.829	9.772	17.778	0.215379	0.549668	0.391834	2.67507	0.385585	0.0145724	0.00668929	0.00543188		3.68935e+06	3.93574e+06	1.85796e+07	0.19857	0.211831	0.937397	3.67888	3.46893	0.0612125	0.30093	0.0401285		585195	987726	2.65014e+07	0.0220816	0.0372707
6	PD6	92	1	2			5.36	10.9725	21.7975	0.2459	0.503383	0.488494		5.42857	5.85857	17.4643	0.310838	0.33546	0.926603		4.62875	4.205	14.2438	0.324967	0.295217	1.10077	2.56879	0.575261	0.0220612	0.0156491	0.0151265		356561	2.49331e+06	7.70921e+06	0.0462513	0.32342	0.143007	3.18801	8.92012	0.328243	1.67865	0.186603		46100.6	1.28116e+06	2.31246e+07	0.00199357	0.0554023
7	PD7	84	0	4			3.9	16.8583	36.7017	0.106262	0.459334	0.23134		2.9425	3.8475	12.835	0.229256	0.299766	0.764782		n/a	n/a	n/a	n/a	n/a	n/a	2.68673	0.611456	0.0734649	0.00460736	0.0260976		4.11639e+06	1.49806e+06	1.96326e+07	0.209671	0.0763048	2.74781	3.3043	5.23759	0.239144	0.501903	0.112475		1524.03	450026	2.40783e+07	6.32949e-05	0.0186901
8	PD8	83	1	2			n/a	n/a	n/a	n/a	n/a	n/a		2.9225	6.275	14.0775	0.207601	0.445747	0.465737		3.925	3.58	9.79833	0.400578	0.365368	1.09637	1.59218	0.30247	IP	0.00354886	0.00508282		54349.7	445401	593848	0.0915213	0.750025	0.122024	2.33516	3.30953	0.0855311	0.400495	0.0340656		1.42741e+06	1.87673e+06	2.68413e+07	0.0531796	0.0699192
9	PD9	77	1	4.33			1.035	3.415	5.015	0.206381	0.680957	0.303075		3.95	4.29	25.93	0.152333	0.165445	0.920746		2.04889	4.27	17.8922	0.114513	0.238651	0.479833	2.6205	0.470768	0.0120924	0.00187478	0.0162529		63284.6	969832	3.99284e+06	0.0158495	0.242893	0.0652531	1.50651	6.26512	0.129197	0.557119	0.0991015		761893	444010	2.29955e+07	0.0331322	0.0193085
10	PD10	89	1	4.18			3.48167	16.0283	26.6783	0.130505	0.6008	0.21722		2.56	7.89	15.3662	0.166599	0.513463	0.324461		3.779	9.85333	18.4307	0.205039	0.534616	0.383525	2.3638	0.429227	IP	0.0101075	0.010014		3.08645e+06	4.81333e+06	1.39255e+07	0.221641	0.34565	0.64123	2.66191	3.77691	0.187496	0.0262828	0.0108097		1.20612e+06	1.64422e+06	3.07856e+07	0.0391782	0.0534087
11	PD11	79	0	5.33			3.69333	8.52	21.6183	0.170843	0.39411	0.43349		3.75143	6.08286	14.2014	0.264159	0.428327	0.616721		4	6.22	9.865	0.405474	0.630512	0.643087	2.42078	0.723954	IP	0.00739798	0.0103782		948830	5.84366e+06	1.28809e+07	0.0736619	0.453669	0.162369	4.02345	8.64781	0.533391	0.315191	0.0554745		633247	440478	3.11789e+07	0.0203101	0.0141274
12	PD12	83.5784	0	6			7.35	16.42	56.055	0.131121	0.292927	0.447625		5.285	8.72	34.605	0.152724	0.251987	0.606078		9.89	10.22	60.66	0.16304	0.16848	0.96771	2.1209	0.0298228	0.00608031	IP	0.00649976		146174	3.15348e+06	7.1059e+06	0.0205707	0.443783	0.0463531	3.30658	6.67001	0.586766	1.00995	0.356377		63900.9	224685	2.14268e+07	0.00298229	0.0104862
13	PD13	63.2225	1	<24			3.966	9.148	30.888	0.128399	0.296167	0.433537		4.09857	7.27143	23.6814	0.173071	0.307052	0.563654		2.57333	9.97	14.74	0.174582	0.676391	0.258108	1.52763	0.215627	0.0344855	IP	0.0153101		78120.1	1.11165e+06	1.13619e+07	0.00687564	0.0978405	0.070274	2.00598	6.07992	0.14478	0.26896	0.0515571		863239	356219	1.75538e+07	0.0491767	0.020293
14	PD14	79.0637	1	<24			7.166	16.0008	68.596	0.104467	0.233261	0.447854		5.6082	9.8042	28.5662	0.196323	0.34321	0.57202		n/a	n/a	n/a	n/a	n/a	n/a	2.33059	0.0739645	IP	0.00470588	0.00297619		1926.58	158661	1.52438e+06	0.00126384	0.104082	0.0121428	-1	0.041374	0.00167525	0.00220317	0.00143792		48783	211978	8.15366e+06	0.00598296	0.0259979
	Mean	79.776	10			Mean	4.93837	12.2561	34.7135	0.155693	0.405703	0.407177		4.57083	7.24986	21.9695	0.212878	0.343954	0.646759		4.32436	6.84185	19.8724	0.24618	0.418364	0.734826	2.27789	0.387269	0.0312869	0.00657919	0.0105766		1.69324e+06	2.75558e+06	9.88976e+06	0.128692	0.317383	0.537115	2.61241	5.29623	0.253826	0.494641	0.0962715		499894	789054	2.48706e+07	0.0199289	0.03127
	SEM	2.23049	2.23049			SEM	0.532517	1.14907	4.78489	0.0120395	0.0391665	0.0283023		0.482459	0.676236	2.01379	0.01492	0.0260514	0.0437394		0.660825	0.820513	4.36195	0.0284401	0.056974	0.141481	0.098556	0.0536153	0.00931181	0.00111121	0.00175641		532205	508967	1.64089e+06	0.0337164	0.0482859	0.197888	0.331417	0.673665	0.0706911	0.116716	0.0304056		123092	157044	1.80591e+06	0.00487816	0.00552296
Abbreviations: α-Syn=α-synuclein; Coloc. Index =α-synuclein-tyrosine hydroxylase colocalization index; CTRL=control; cTnT=cardiac troponin T; DA=dopamine; DHPG=3,4-dihydroxyphenylglycol; DOPAC=3,4-dihydroxyphenylacetic acid; NE=norepinephrine; PD= Parkinson's disease; PMI=post-mortem intervals; SMA=smooth muscle actin; SMG =submandibular gland; TH=tyrosine hydroxylase.
[truncated: 6 more columns]
